# Supplementary material for: Integrated exome and RNA sequencing of TFE3-translocation renal cell carcinoma
Source: PubMed Central journal article supplement (PMC8421377; doi:10.1038/s41467-021-25618-z), 2021-09-06
Supplement: 41467_2021_25618_MOESM1_ESM.pdf [file 41467_2021_25618_MOESM1_ESM.pdf]

# Supplementary Figure 1

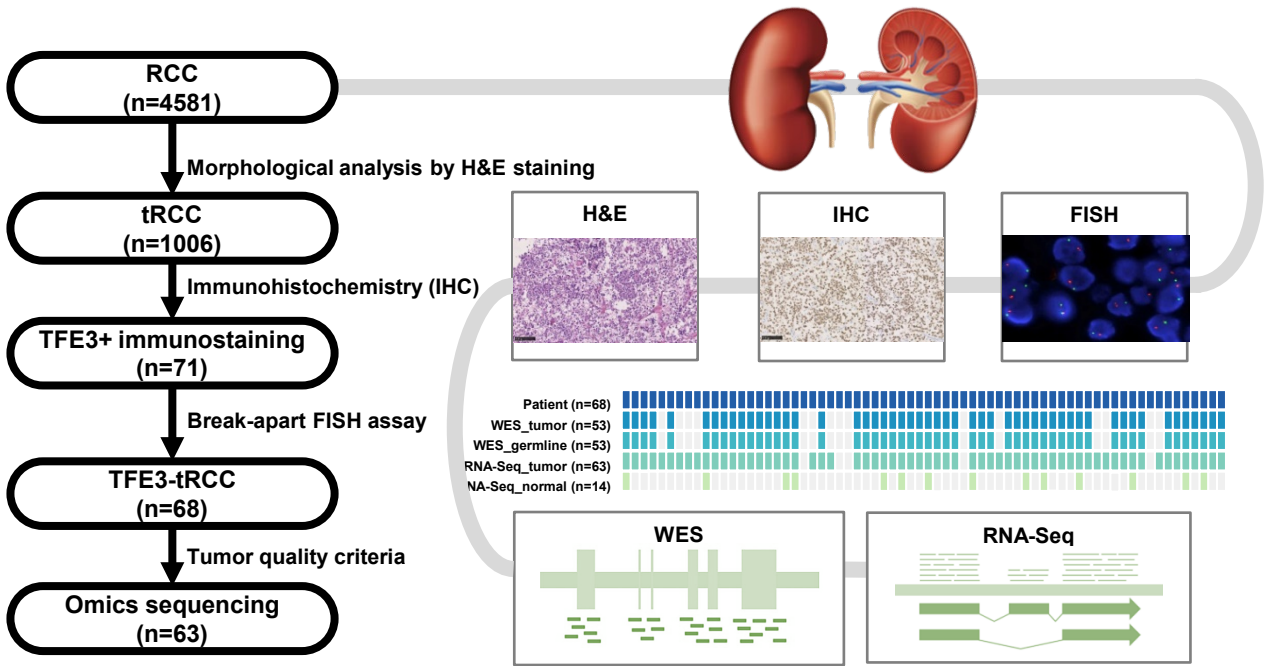

**Supplementary Figure 1. CONSORT flow-diagram indicates screening process of *TFE3*-tRCC and disposition for the various analyses. *TFE3*-tRCC = *TFE3*-translocation renal cell carcinoma.**

## Supplementary Figure 2

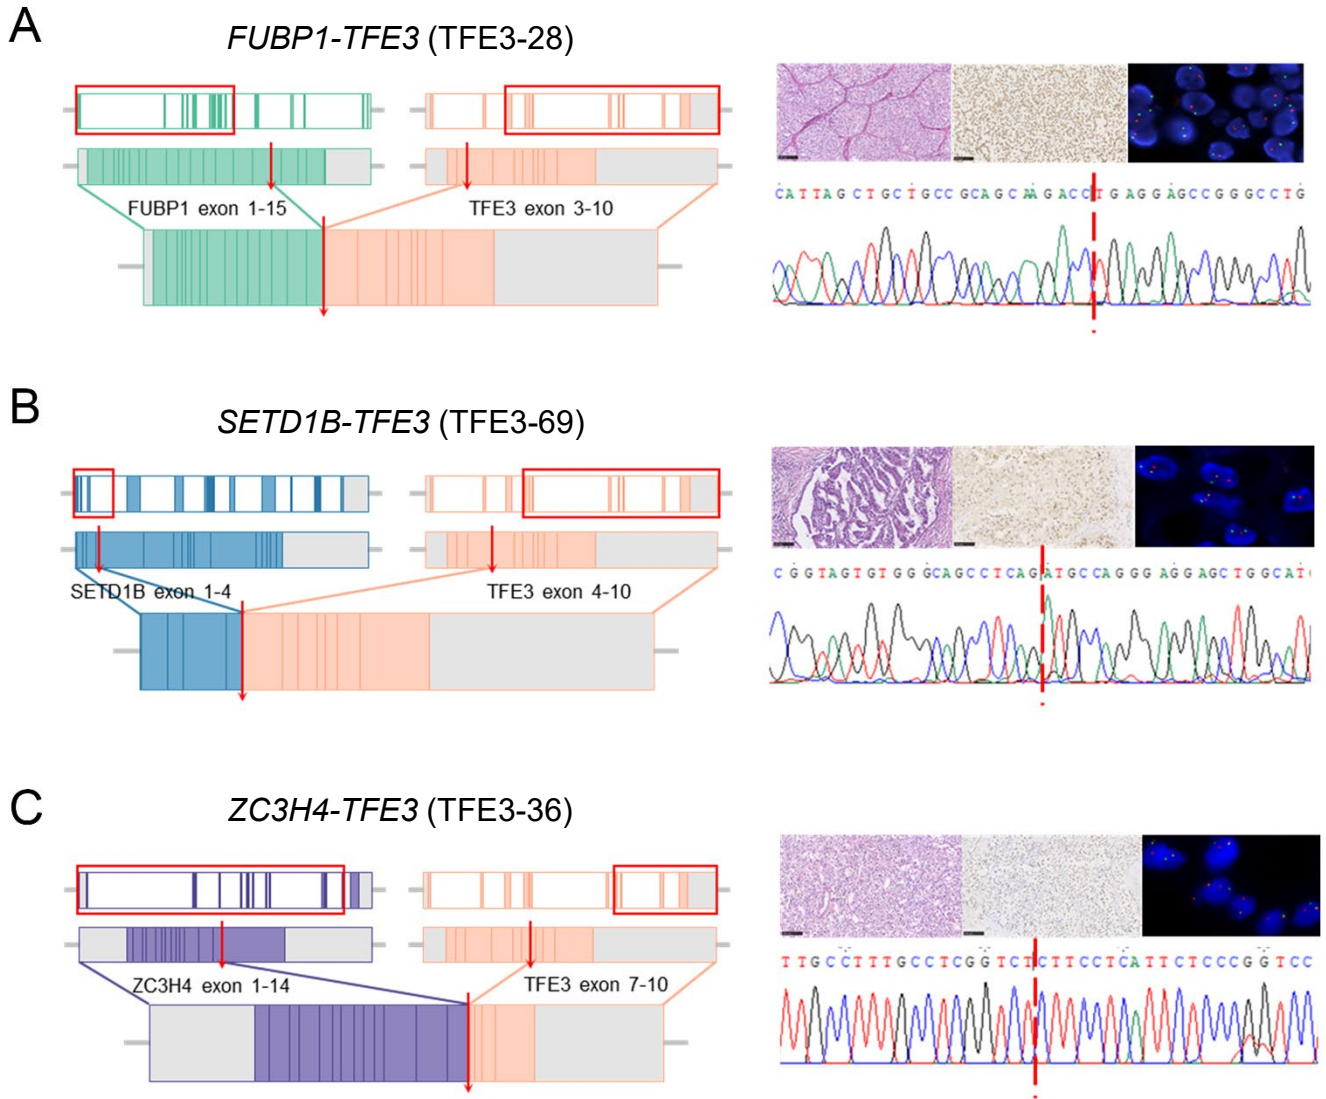

### Supplementary Figure 2. Validation of three rare gene fusions.

Schematic of *FUBP1-TFE3* (A), *SETD1B-TFE3* (B) and *ZC3H4-TFE3* (C) fusion genes. The region in the red box includes the retained exons of fusion genes, and the red arrow denotes the breakpoints in the mRNA (upper panel). Pathologic images (H&E, TFE3 IHC and break-apart FISH assay, top) and sequencing chromatogram (bottom) are showed on the right. The red dashed line represents the breakpoint. Five random high-power fields were used for pathologic evaluation (H&E staining). Five random high-power fields were checked for TFE3 positive expression. One hundred non-overlapping tumor nuclei were evaluated for the rearrangement signals (break-apart FISH assay). IHC = immunohistochemistry. Magnification  $\times 200$ . Scale bar = 100 $\mu$ m.

## Supplementary Figure 3

A

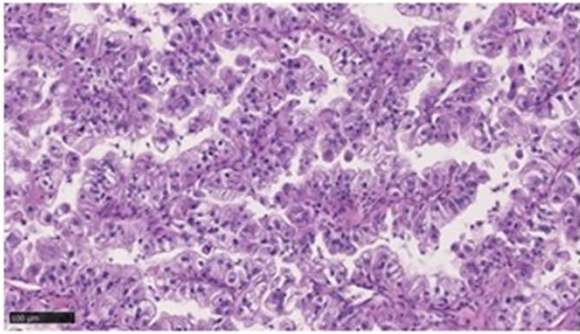

*ASPSCR1-TFE3* (TFE3-32)

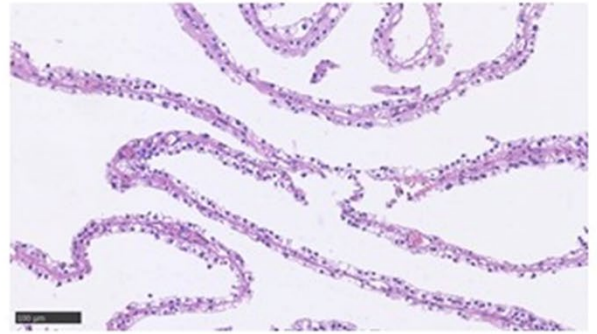

*MED15-TFE3* (TFE3-21)

B

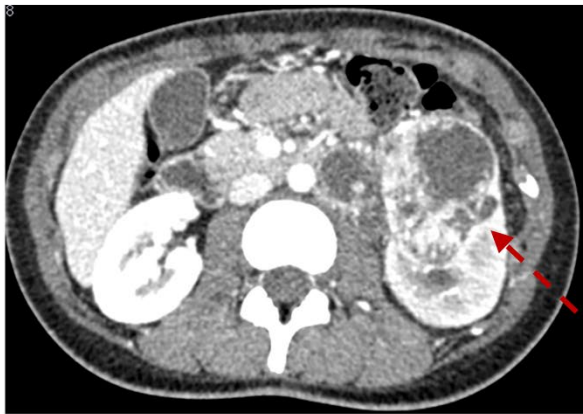

*ASPSCR1-TFE3* (TFE3-24)

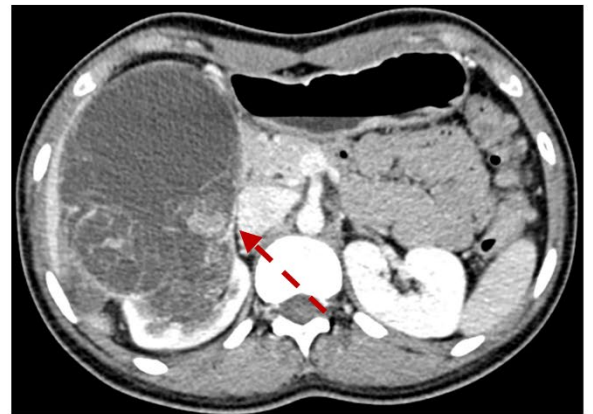

*MED15-TFE3* (TFE3-38)

### Supplementary Figure 3. Morphologic and Radiologic features of tumors with *ASPSCR1-TFE3* and *MED15-TFE3* fusion.

(A) Typical morphologic images of tumors with *ASPSCR1-TFE3* (left) and *MED15-TFE3* fusion (right). Five random high-power fields were used for pathologic evaluation (H&E staining). Magnification  $\times 200$ . Scale bar = 100 $\mu$ m.

(B) Typical radiologic images in contrast-enhanced coronal reformat CT of tumors with *ASPSCR1-TFE3* (left) and *MED15-TFE3* fusion (right).

# Supplementary Figure 4

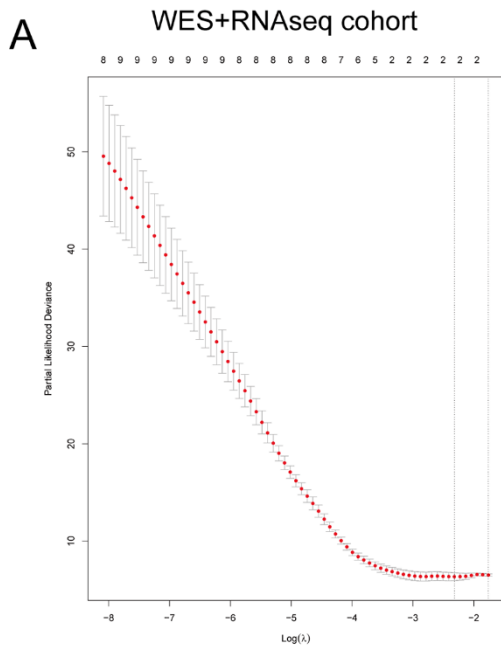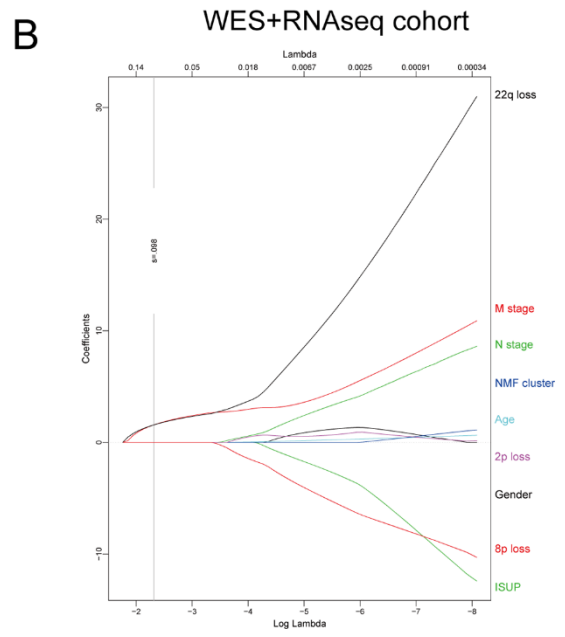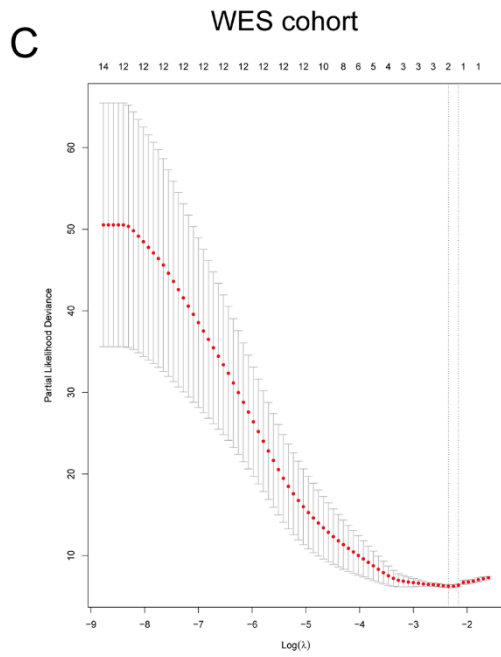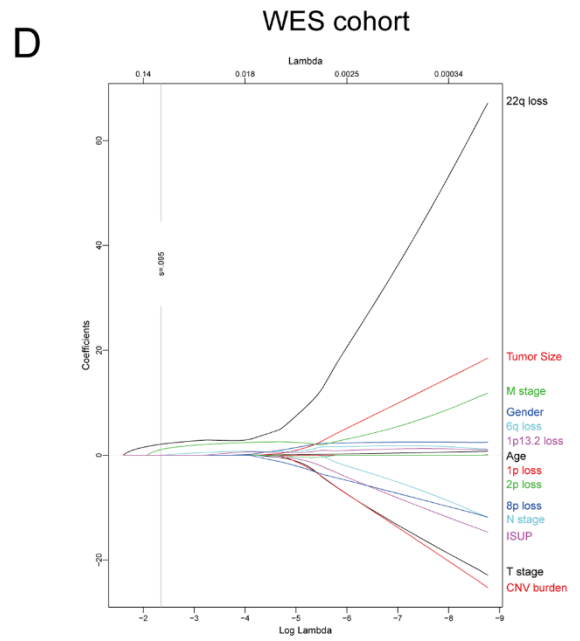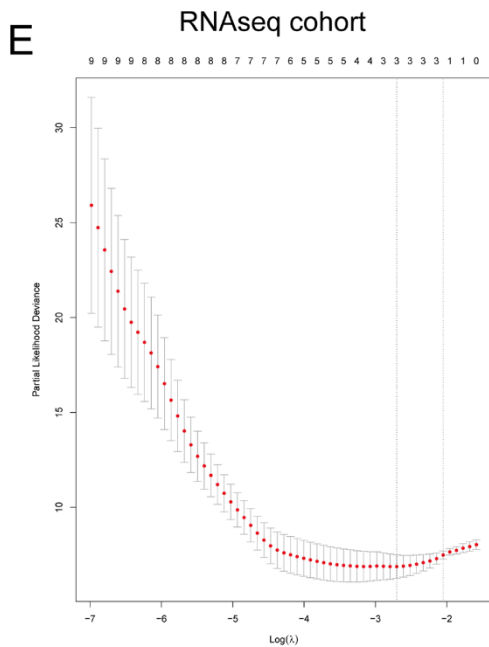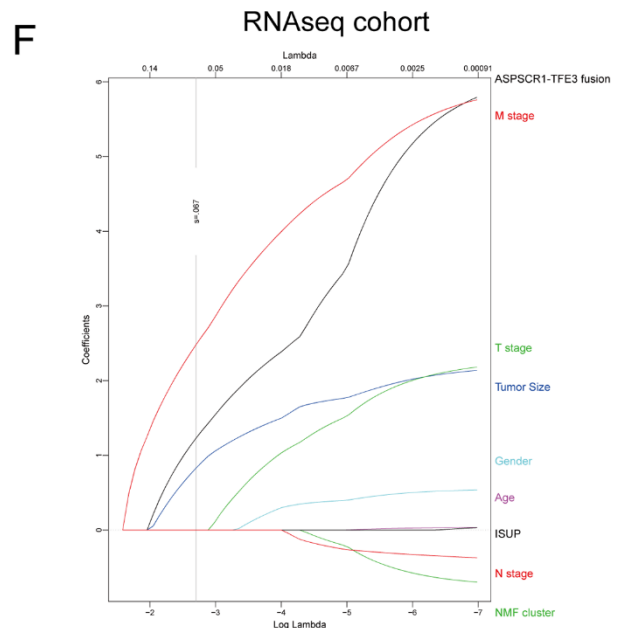

**Supplementary Figure 4. Identify potential predictors for overall survival using LASSO cox regression.**

(A) LASSO coefficient profiles of 16 prognosticators in WES+RNAseq cohort (n = 44).

(C) LASSO coefficient profiles of 14 prognosticators in WES cohort (n = 53).

(E) LASSO coefficient profiles of 9 prognosticators in WES cohort (n = 63).

(B, D and F) Cross-validation for turning parameter selection via minimum criteria in the LASSO regression model.

Data were expressed as mean  $\pm$  SD (A, C, E). OS = overall survival, LASSO = least absolute shrinkage and selection operator, SD = standard deviation.

## Supplementary Figure 5

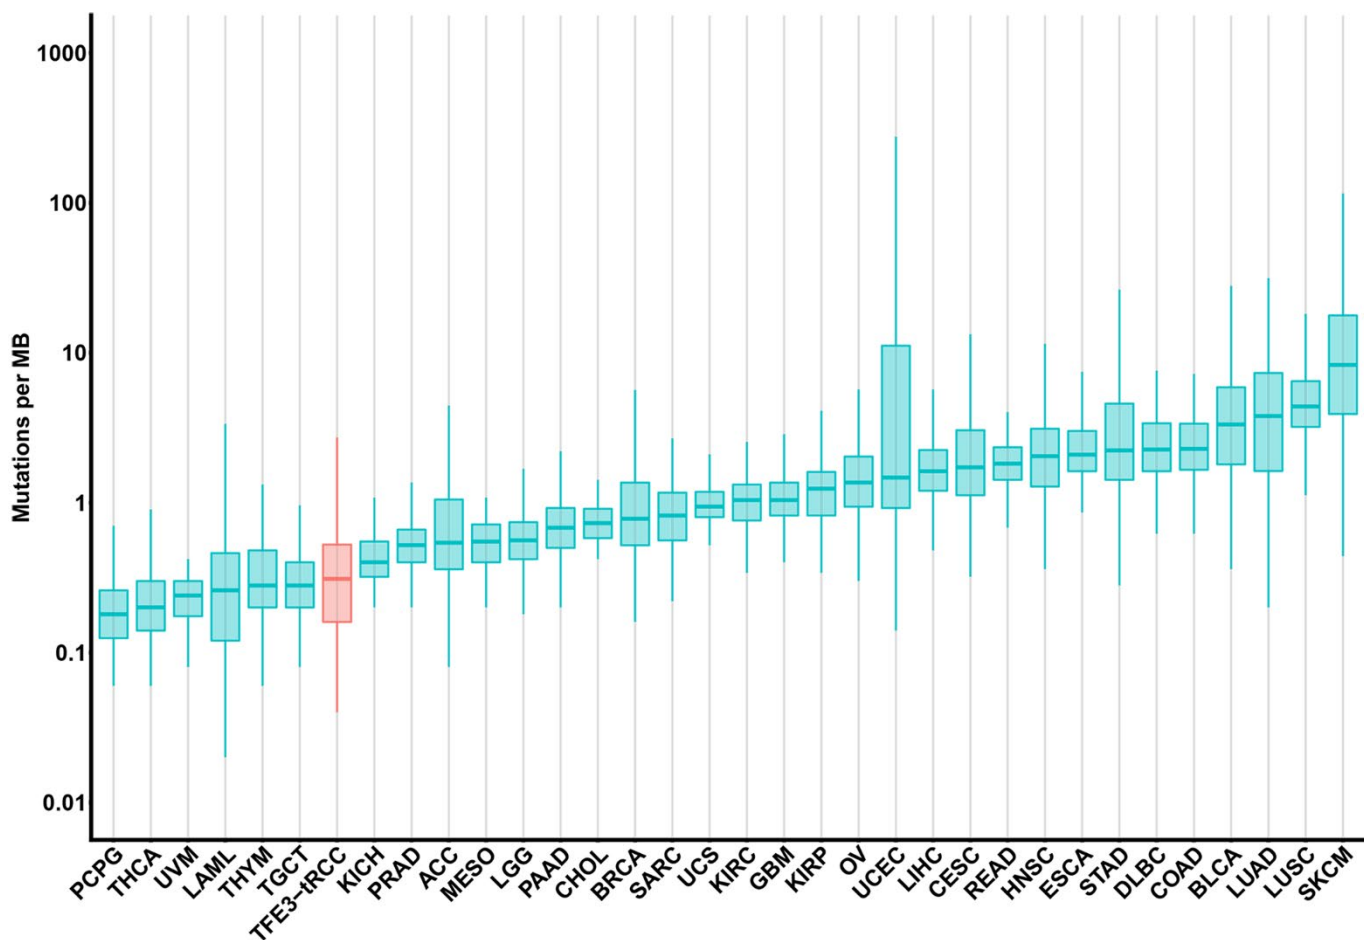

### Supplementary Figure 5. Tumor mutation burden in *TFE3*-tRCC and compare with 33 tumor types from TCGA.

*TFE3*-tRCC = *TFE3*-translocation renal cell carcinoma (n = 53), ACC = adrenocortical carcinoma (n = 92), BLCA = bladder urothelial carcinoma (n = 411), BRCA = invasive breast carcinoma (n = 1020), CESC = cervical and endocervical cancers (n = 289), CHOL = cholangiocarcinoma (n = 36), COAD = colon adenocarcinoma (n = 404), DLBC = lymphoid neoplasm diffuse large B-cell lymphoma (n = 37), ESCA = esophageal carcinoma (n = 184), GMB = glioblastoma multiforme (n = 388), HNSC = head and neck squamous cell carcinoma (n = 507), KICH = chromophobe renal cell carcinoma (n = 66), KIRC = renal clear cell carcinoma (n = 369), KIRP = renal papillary cell carcinoma (n = 281), LAML = acute myeloid leukemia (n = 137), LGG = brain lower grade glioma (n = 510), LIHC = liver hepatocellular carcinoma (n = 363), LUAD = lung adenocarcinoma (n = 514), LUSC = lung squamous cell carcinoma (n = 458), MESO = mesothelioma (n = 82), OV = ovarian serous cystadenocarcinoma (n = 411), PAAD = pancreatic adenocarcinoma (n = 175), PCPG = pheochromocytoma and paraganglioma (n = 178), PRAD = prostate adenocarcinoma (n = 494), READ = rectum adenocarcinoma (n = 149), SARC = sarcoma (n = 236), SKCM = skin cutaneous melanoma (n = 466), STAD = stomach adenocarcinoma (n = 438), TGCT = testicular germ cell tumors (n = 128), THCA = thyroid carcinoma (n = 491), THYM = thymoma (n = 123), UCEC = uterine corpus endometrial carcinoma (n = 530), UCS = uterine carcinosarcoma (n = 57), UVM = uveal melanoma (n = 80).

Box plots show median levels (middle line), 25th and 75th percentile (box), and the whiskers. The upper whisker =  $\min(\max(x), Q3 + 1.5 \times IQR)$ , the lower whisker =  $\max(\min(x), Q1 - 1.5 \times IQR)$ . TCGA = The Cancer Genome Atlas, TMB = Tumor mutation burden, IQR = interquartile range.



**Supplementary Figure 6. Mutational signatures analysis.**

(A) Metrics plot showing the optimal solution contained three signatures.

(B) Mutational signature barplots. Signature A corresponds to SBS87 and SBS1, Signature B corresponds to SBS40, and Signature C corresponds to SBS22. These corresponding signatures are defined by COSMIC mutational signatures v3.2

(<https://cancer.sanger.ac.uk/cosmic/signatures>).

SBS = single-base substitution.



# Supplementary Figure 7

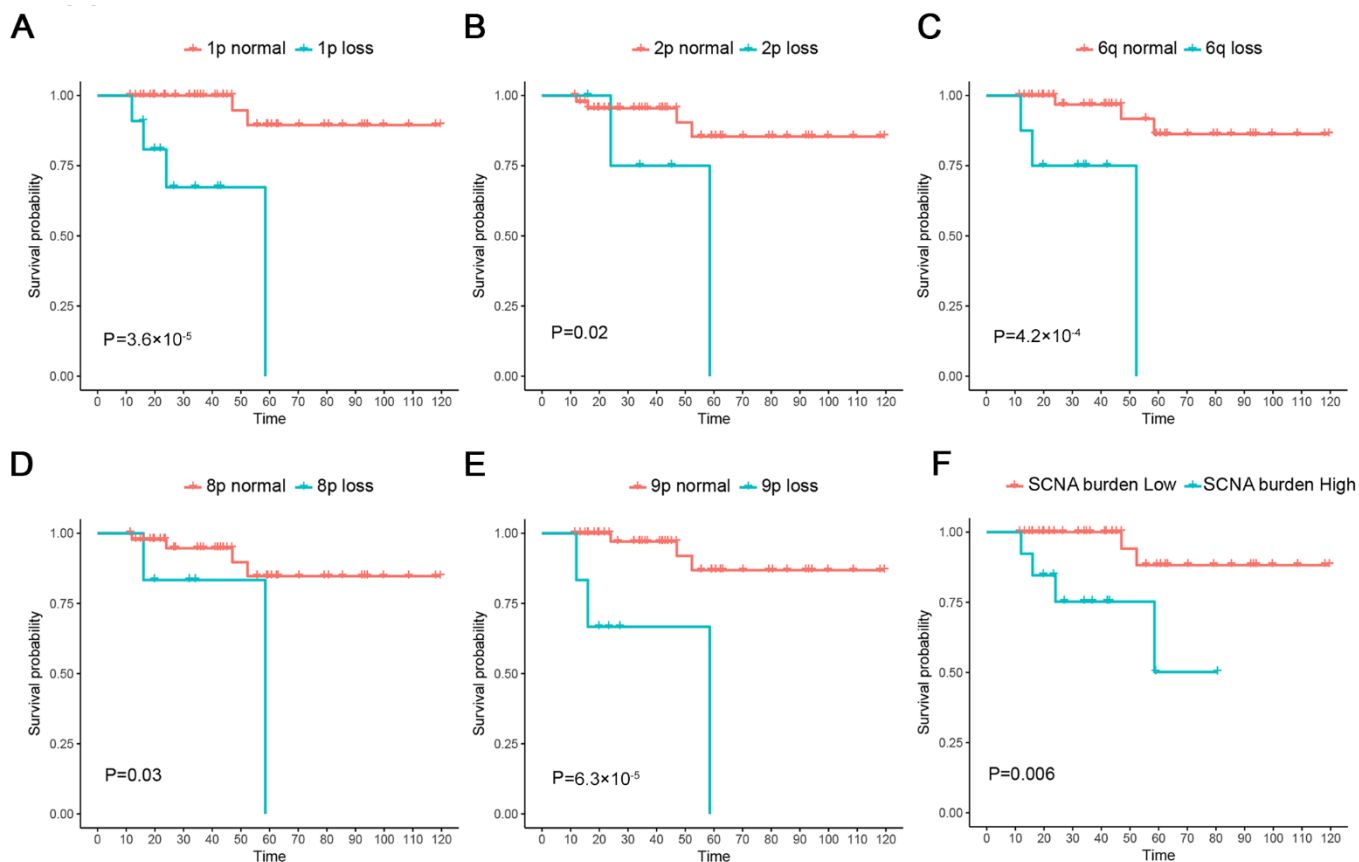

## Supplementary Figure 7. SCNAs associated with overall survival.

(A-E) Overall survival by the status of 6 chromosome regions with loss.

(F) Overall survival by the status of SCNA burden. SCNA burden  $\geq$  75th percentile of SCNA burden was defined as SCNA high.

P-values were determined by two-sided log-rank test (A-F). SCNA = Somatic copy number alterations.

# Supplementary Figure 8

A

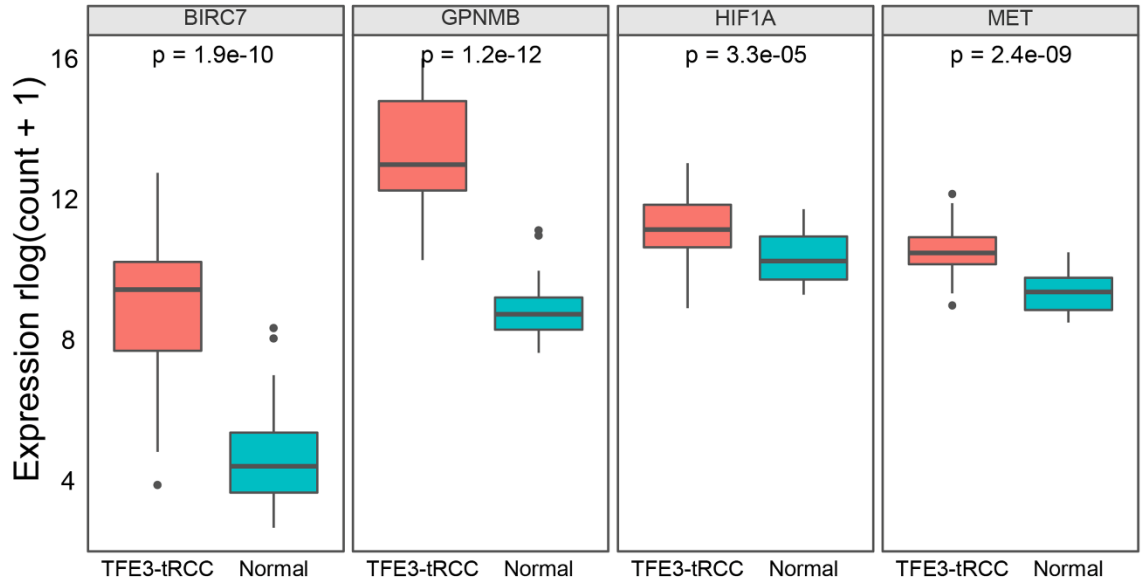

B

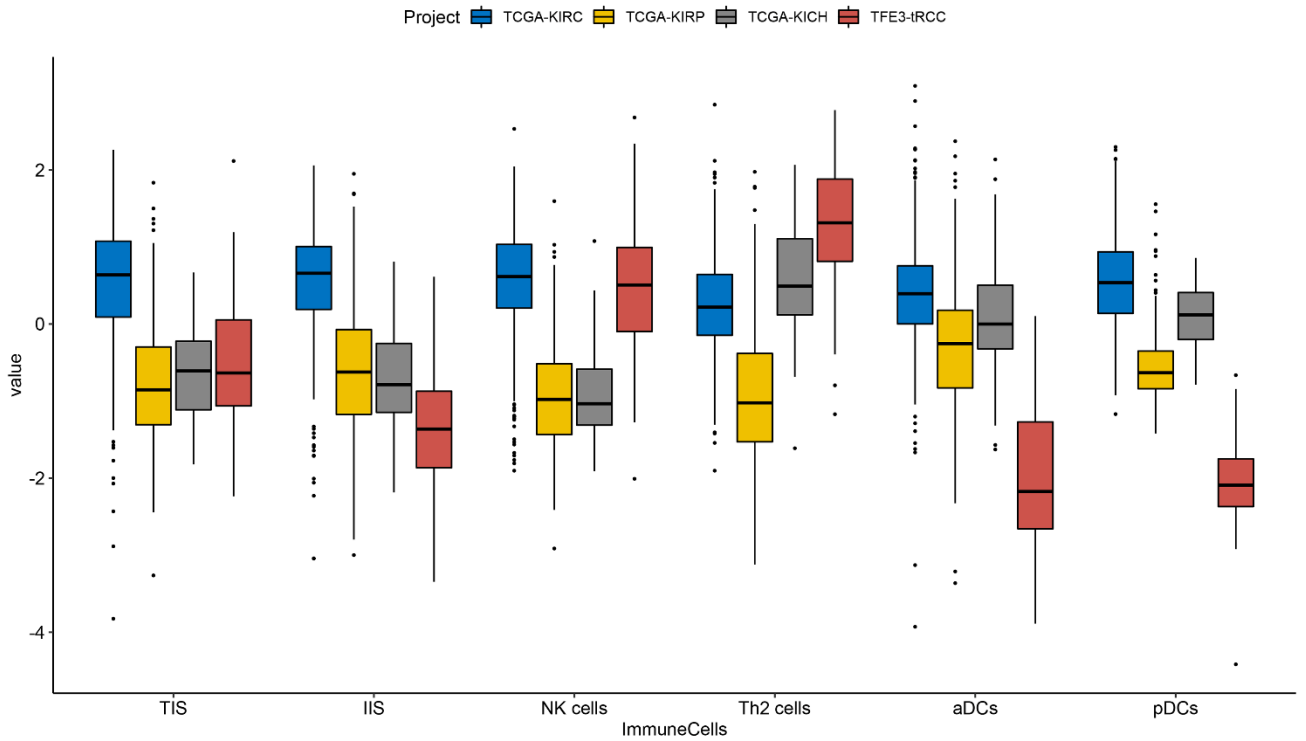

C

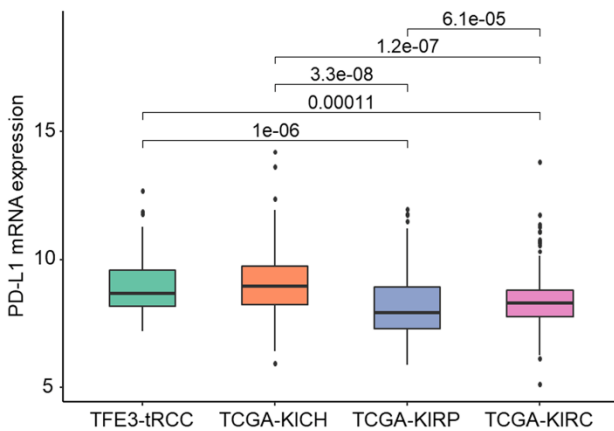

D

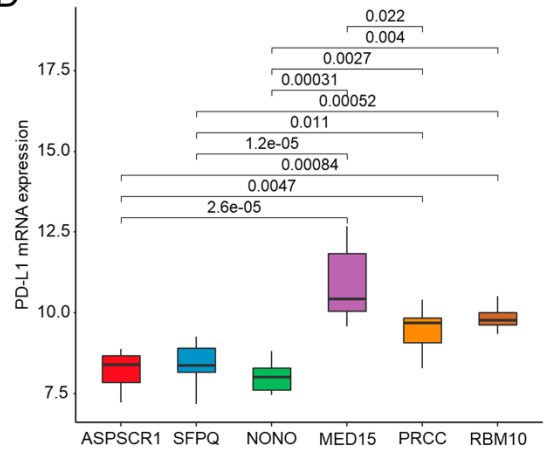

### **Supplementary Figure 8. Different mRNA expression in *TFE3*-tRCC**

(A) Box plots show mRNA expression levels (counts) of indicated genes (*BIRC7*, *GPNMB*, *HIF1A* and *MET*) in tumors (red, n =63) and adjacent normal tissues (green, n = 14).

(B) Differential expression for each gene signature was analyzed between the TCGA-RCC and our *TFE3*-tRCC cohorts (n = 63). KICH (n = 65), KIRC (n = 539), KIRP (n = 289).

(C) Comparative expression of *PD-L1* mRNA expression between the different histological RCC. *TFE3*-tRCC (n = 63), KICH (n = 65), KIRC (n = 539), KIRP (n = 289).

(D) Comparative expression of *PD-L1* mRNA expression between the different *TFE3*-tRCC subtypes. *SFPQ-TFE3* (n=15), *ASPSCR1-TFE3* (n=13), *NONO-TFE3* (n=8), *MED15-TFE3* (n=8), *PRCC-TFE3* (n=6) and *RBM10-TFE3* fusions (n=4).

Box plots show median levels (middle line), 25th and 75th percentile (box), 1.5 times the interquartile range (whiskers) as well as outliers (single points). *P*-values were determined by the two-sides Mann-Whitney U test (A, C, D). *TFE3*-tRCC = *TFE3*-translocation renal cell carcinoma, TCGA = The Cancer Genome Atlas, KICH = chromophobe renal cell carcinoma, KIRC = renal clear cell carcinoma, KIRP = renal papillary cell carcinoma.

## Supplementary Figure 9

*PRCC-TFE3* (TFE3-22)

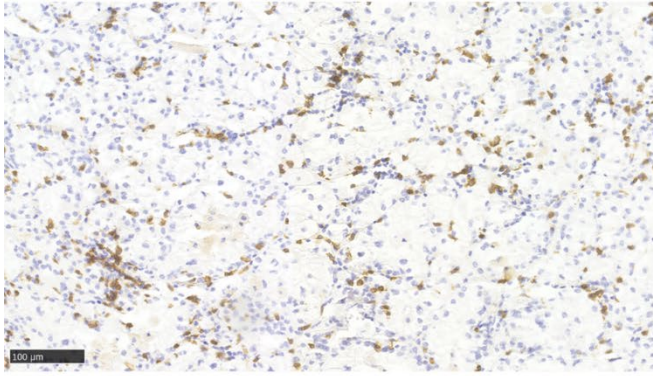

*NONO-TFE3* (TFE3-47)

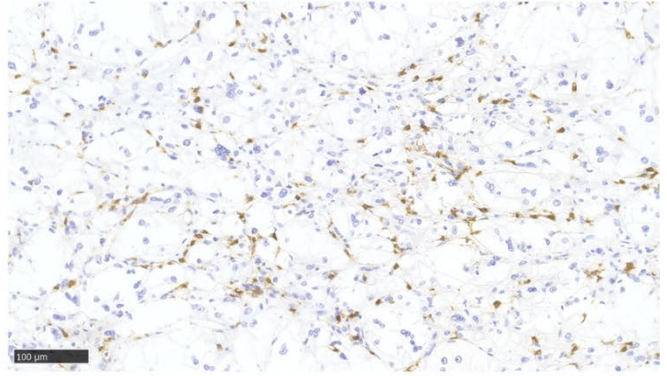

*SFPQ-TFE3* (TFE3-57)

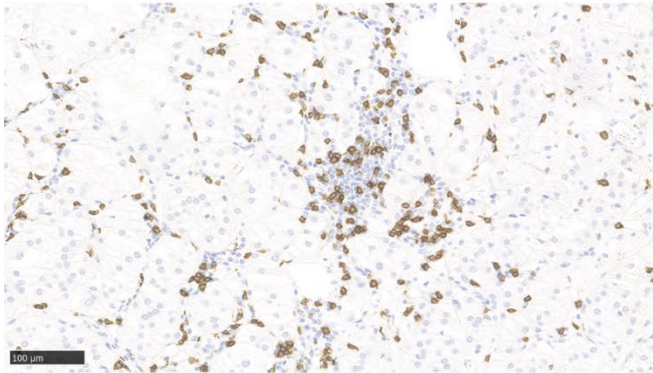

*ASPSCR1-TFE3* (TFE3-62)

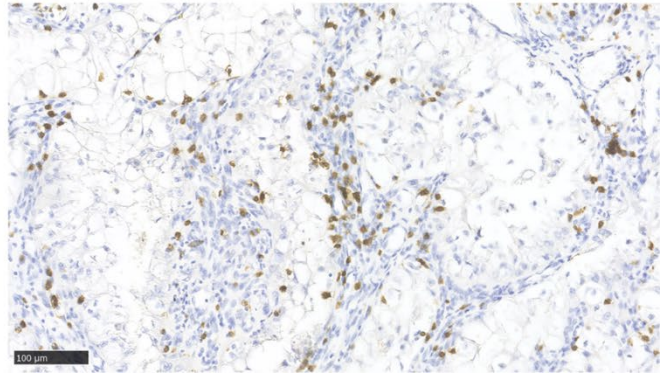

### Supplementary Figure 9. CD8 expression in *TFE3*-tRCC.

Images of IHC staining of samples from patients with high CD8+ T cell infiltration in four selected samples (TFE3-22, TFE3-47, TFE3-57, and TFE3-62) from our cohort. Ten random high-power fields of tumor parenchyma were checked for CD8 positive expression. Magnification  $\times 200$ . Scale bar = 100 $\mu$ m.

*TFE3*-tRCC = *TFE3*-translocation renal cell carcinoma.

# Supplementary Figure 10

## A

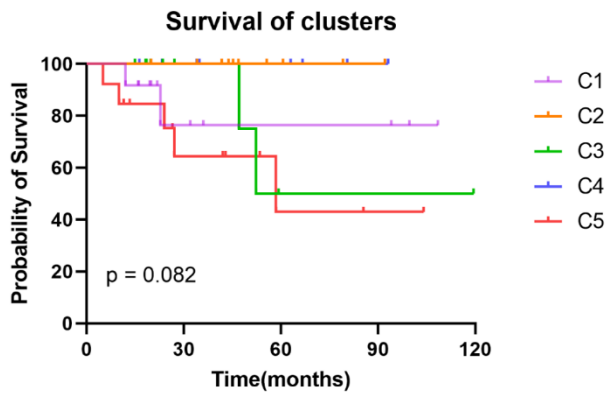

## B

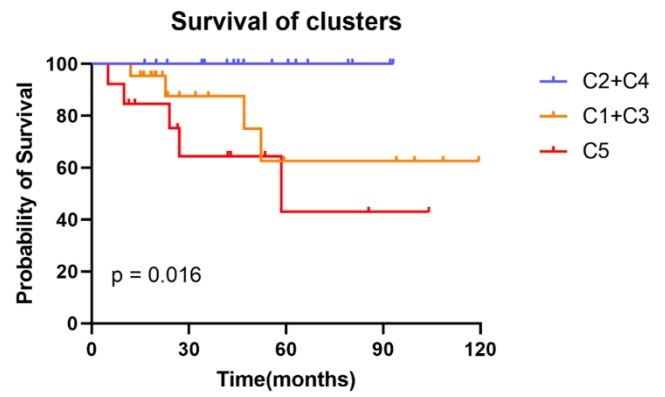

### Supplementary Figure 10. Survival analysis of *TFE3*-tRCC NMF cluster

(A-B) Kaplan-Meier curves show the OS for patients with different NMF clusters. *P*-values were determined by two-sided log-rank test. C1, n = 12; C2, n = 11; C3, n = 10; C4, n = 8; C5, n = 13.

*TFE3*-tRCC = *TFE3*-translocation renal cell carcinoma, OS = overall survival, NMF = non-negative matrix factorization.

**Supplementary Table 1. Baseline clinicopathologic characteristics of different *TFE3*-tRCC fusion subtypes.**

| Characteristics                       | Fusion Subtype             |                               |                           |                            |                           |                            |                 |                  |
|---------------------------------------|----------------------------|-------------------------------|---------------------------|----------------------------|---------------------------|----------------------------|-----------------|------------------|
|                                       | <i>SFPQ-TFE3</i><br>(n=15) | <i>ASPSCR1-TFE3</i><br>(n=13) | <i>NONO-TFE3</i><br>(n=8) | <i>MED15-TFE3</i><br>(n=8) | <i>PRCC-TFE3</i><br>(n=6) | <i>RBM10-TFE3</i><br>(n=4) | Others<br>(n=3) | Unknown<br>(n=6) |
| <b>Female, n (%)</b>                  | 10 (66.7)                  | 10 (76.9)                     | 3 (37.5)                  | 6 (75.0)                   | 4 (66.7)                  | 1 (25.0)                   | 2 (66.7)        | 3 (50.0)         |
| <b>Age, median (range)</b>            | 34 (12-69)                 | 22 (6-52)                     | 37.5 (18-70)              | 43 (20-70)                 | 35 (24-42)                | 56 (37-63)                 | 43 (42-56)      | 28 (10-58)       |
| <b>Tumor Size, median (cm, range)</b> | 4.7 (2.8-17.5)             | 6.0(2.0-19.6)                 | 4.9 (2.4-19.4)            | 5.9 (3.3-13.4)             | 3.9 (1.4-6.1)             | 4.5 (3.8-10.0)             | 11.0 (6.5-11.2) | 3.4 (3.0-5.5)    |
| <b>T Stage, n (%)</b>                 |                            |                               |                           |                            |                           |                            |                 |                  |
| ≤ T2                                  | 15(100.0)                  | 10 (76.9)                     | 6 (75.0)                  | 7 (87.5)                   | 6(100.0)                  | 2 (50.0)                   | 2 (66.7)        | 5 (83.3)         |
| ≥ T3                                  | 0(0.0)                     | 3 (23.1)                      | 2 (25.0)                  | 1 (12.5)                   | 0(0.0)                    | 2 (50.0)                   | 1 (33.3)        | 1 (16.7)         |
| <b>N stage, n (%)</b>                 |                            |                               |                           |                            |                           |                            |                 |                  |
| N0                                    | 13 (86.7)                  | 7 (53.8)                      | 6 (75.0)                  | 7 (87.5)                   | 5(83.3)                   | 4 (100.0)                  | 2 (66.7)        | 4 (66.7)         |
| N1                                    | 2 (13.3)                   | 6 (46.2)                      | 2 (25.0)                  | 1 (12.5)                   | 1(16.7)                   | 0(0.0)                     | 1 (33.3)        | 2 (33.3)         |
| <b>M, n (%)</b>                       |                            |                               |                           |                            |                           |                            |                 |                  |
| M0                                    | 13 (86.7)                  | 12 (92.3)                     | 6(75.0)                   | 8(100.0)                   | 5 (83.3)                  | 4 (100.0)                  | 1 (33.3)        | 6 (100.0)        |
| M1                                    | 2 (13.3)                   | 1 (7.7)                       | 2(25.0)                   | 0(0.0)                     | 1 (16.7)                  | 0(0.0)                     | 2 (66.7)        | 0 (0.0)          |
| <b>ISUP grade, n (%)</b>              |                            |                               |                           |                            |                           |                            |                 |                  |
| ≤ 2                                   | 6 (40.0)                   | 2 (15.4)                      | 7(87.5)                   | 8(100.0)                   | 4(66.7)                   | 0(0.0)                     | 1 (33.3)        | 1 (16.7)         |
| ≥ 3                                   | 9 (60.0)                   | 11 (84.6)                     | 1(12.5)                   | 0(0.0)                     | 2(33.3)                   | 4 (100.0)                  | 2 (66.7)        | 5 (83.3)         |

ISUP = The International Society of Urological Pathology.

*P*-values were determined by Pearson's chi-square test.

**Supplementary Table 2. Multivariate analyses of clinicopathologic and genomic features in predicting OS**

|                            | WES+RNA-seq cohort<br>(n=44, variates=16) |         | WES cohort<br>(n=53, variates=14) |         | RNA-seq cohort<br>(n=63, variates=9) |                       |
|----------------------------|-------------------------------------------|---------|-----------------------------------|---------|--------------------------------------|-----------------------|
|                            | HR (95%CI)                                | P-Value | HR (95%CI)                        | P-Value | HR (95%CI)                           | P-Value               |
| <b>Tumor size, cm</b>      |                                           |         |                                   |         |                                      |                       |
| ≥ Median vs. < Median      | -                                         | -       | -                                 | -       | 7.88 (1.24-50.22)                    | 0.029                 |
| <b>M stage</b>             |                                           |         |                                   |         |                                      |                       |
| 1 vs. 0                    | 35.16 (2.58-479.06)                       | 0.008   | 32.79 (2.58-416.11)               | 0.007   | 93.08 (7.44-1164.81)                 | 4.37×10 <sup>-4</sup> |
| <b>22p loss</b>            |                                           |         |                                   |         |                                      |                       |
| Yes vs. No                 | 30.32 (3.00-306.6)                        | 0.004   | 52.49 (5.58-493.64)               | 0.001   | -                                    | -                     |
| <b>ASPSCR1-TFE3 fusion</b> |                                           |         |                                   |         |                                      |                       |
| Yes vs. No                 | -                                         | -       | -                                 | -       | 17.42 (2.00-151.72)                  | 0.010                 |

WES+RNA-seq cohort: Adjusted for Gender, Age, Tumor size, ISUP grade, T stage, N stage, M stage, SCNA burden, 1p loss, 2p loss, 6q loss, 8p loss, 9p loss, 22p loss, *ASPSCR1-TFE3* fusion and NMF cluster.

WES cohort: Adjusted for Gender, Age, Tumor size, ISUP grade, T stage, N stage, M stage, SCNA burden, 1p loss, 2p loss, 6q loss, 8p loss, 9p loss and 22p loss.

RNA-seq cohort: Adjusted for Gender, Age, Tumor size, ISUP grade, T stage, N stage, M stage, *ASPSCR1-TFE3* fusion, NMF cluster.

Covariate *P*-values derived from z-scores are two-sided.

OS = overall survival, WES = whole-exome sequencing, SCNA = somatic copy number alteration, ISUP = The International Society of Urological Pathology, NMF = non-negative matrix factorization, HR = hazard ratio, CI = confidence interval.

**Supplementary Table 3. Univariate survival analysis of frequent mutation genes and somatic copy number alterations**

| Covariate             | Levels       | Number    | Median OS (months) | 2-year OS       | Log-rank P           |
|-----------------------|--------------|-----------|--------------------|-----------------|----------------------|
| <i>DST</i> mutation   | Yes vs. No   | 5 vs. 46  | 82.2 vs. 104.1     | 100% vs. 92.2%  | 0.842                |
| <i>DNAH8</i> mutation | Yes vs. No   | 3 vs. 48  | -                  | 100% vs. 92.7%  | 0.661                |
| <i>HMHA1</i> mutation | Yes vs. No   | 4 vs. 47  | 73.8 vs. 103.8     | 75.0% vs. 94.8% | 0.442                |
| TMB*                  | High vs. Low | 12 vs. 39 | 110.9 vs. 100.1    | 91.7% vs. 93.6% | 0.701                |
| 1p loss               | Yes vs. No   | 11 vs. 40 | 45.4 vs. 112.1     | 66.2% vs. 100%  | 3.6×10 <sup>-5</sup> |
| 2p loss               | Yes vs. No   | 5 vs. 46  | 49.9 vs. 107.7     | 75.0% vs. 95.4% | 0.018                |
| 6q loss               | Yes vs. No   | 8 vs. 43  | 42.7 vs. 109.4     | 75.0% vs. 96.7% | 4.2×10 <sup>-4</sup> |
| 8p loss               | Yes vs. No   | 6 vs. 45  | 51.4 vs. 107.2     | 83.3% vs. 94.5% | 0.031                |
| 9p loss               | Yes vs. No   | 6 vs. 45  | 43.7 vs. 109.6     | 66.7% vs. 97.0% | 6.3×10 <sup>-5</sup> |
| 22p loss              | Yes vs. No   | 7 vs. 44  | 36.0 vs. 112.1     | 44.4% vs. 100%  | 7.9×10 <sup>-8</sup> |
| SCNA burden**         | High vs. Low | 13 vs. 38 | 59.5 vs. 111.3     | 74.7% vs. 100%  | 0.006                |

TMB = tumor mutation burden, SCNA = somatic copy number alteration.

\* TMB ≥ 75<sup>th</sup> percentile of TMB was defined as TMB high, \*\* SCNA ≥ 75<sup>th</sup> percentile of SCNA was defined as SCNA high.

*P*-value was determined by two-sided log-rank test.



**Supplementary Table 4. Baseline clinicopathologic characteristics of different somatic copy number alterations.**

| Characteristics                       | 1p loss<br>(n=11) | 2p loss<br>(n=5) | 6q loss<br>(n= 8) | 8p loss<br>(n=6) | 9p loss<br>(n=6) | 22q loss<br>(n=7) |
|---------------------------------------|-------------------|------------------|-------------------|------------------|------------------|-------------------|
| <b>Age, median (range)</b>            | 25 (22-70)        | 39 (22-70)       | 31 (22-70)        | 31 (22-70)       | 31 (22-69)       | 24 (22-38)        |
| <b>Gender, n (%)</b>                  |                   |                  |                   |                  |                  |                   |
| Male                                  | 3 (27.3)          | 2 (40.0)         | 4 (50.0)          | 4 (66.7)         | 2 (33.3)         | 2 (28.6)          |
| Female                                | 8 (72.7)          | 3 (60.0)         | 4 (50.0)          | 2 (33.3)         | 4 (67.7)         | 5 (71.4)          |
| <b>Tumor size, median (cm, range)</b> | 5.6 (2.1-17.5)    | 6.5 (3.3-6.9)    | 5.6 (4.0-17.5)    | 5.6 (4.9-13.4)   | 6.2 (5.0-17.5)   | 5.6 (2.0-17.5)    |
| <b>T stage, n (%)</b>                 |                   |                  |                   |                  |                  |                   |
| ≤T2                                   | 11 (100.0)        | 5 (100.0)        | 7 (87.5)          | 6 (100.0)        | 5 (83.3)         | 6 (85.7)          |
| ≥T3                                   | 0 (0.0)           | 0 (0.0)          | 1 (12.5)          | 0 (0.0)          | 1 (16.7)         | 1 (14.3)          |
| <b>N stage, n (%)</b>                 |                   |                  |                   |                  |                  |                   |
| N0                                    | 7 (63.6)          | 3 (60.0)         | 6 (75.0)          | 4 (66.7)         | 2 (33.3)         | 2 (28.6)          |
| N1                                    | 4 (36.4)          | 2 (40.0)         | 2 (25.0)          | 2 (33.3)         | 4 (67.7)         | 5 (71.4)          |
| <b>M stage, n (%)</b>                 |                   |                  |                   |                  |                  |                   |
| M0                                    | 10 (90.9)         | 5 (100.0)        | 6 (75.0)          | 6 (100.0)        | 5 (83.3)         | 6 (85.7)          |
| M1                                    | 1 (9.1)           | 0 (0.0)          | 2 (25.0)          | 0 (0.0)          | 1 (16.7)         | 1 (14.3)          |
| <b>ISUP grade, n (%)</b>              |                   |                  |                   |                  |                  |                   |
| ≤ 2                                   | 5 (45.5)          | 3 (60.0)         | 3 (37.5)          | 2 (33.3)         | 1 (16.7)         | 0 (0.0)           |
| ≥ 3                                   | 6 (54.5)          | 2 (40.0)         | 5 (62.5)          | 4 (66.7)         | 5 (83.3)         | 7 (100.0)         |
| <b>ASPSR1-TFE3 fusion (n=8)</b>       |                   |                  |                   |                  |                  |                   |
| No                                    | 5 (50.0)          | 3 (60.0)         | 6 (85.7)          | 4 (80.0)         | 4 (80.0)         | 2 (33.3)          |
| Yes                                   | 5 (50.0)          | 2 (40.0)         | 1 (14.3)          | 1 (20.0)         | 1 (20.0)         | 4 (66.7)          |
| <b>TMB, n (%)</b>                     |                   |                  |                   |                  |                  |                   |
| High (≥ 75 <sup>th</sup> percentile)  | 1 (9.1)           | 0 (0.0)          | 2 (25.0)          | 2 (33.3)         | 3 (50.0)         | 1 (14.3)          |
| Low (< 75 <sup>th</sup> percentile)   | 10 (90.9)         | 5 (100.0)        | 6 (75.0)          | 4 (66.7)         | 3 (50.0)         | 6 (85.7)          |
| <b>SCNA burden, n (%)</b>             |                   |                  |                   |                  |                  |                   |
| High (≥ 75 <sup>th</sup> percentile)  | 8 (72.7)          | 3 (60.0)         | 5 (62.5)          | 4 (66.7)         | 6 (100.0)        | 6 (85.7)          |
| Low (<75 <sup>th</sup> percentile)    | 3 (27.3)          | 2 (40.0)         | 3 (37.5)          | 2 (33.3)         | 0 (0.0)          | 1 (14.3)          |

ISUP = The International Society of Urological Pathology, TMB = tumor mutation burden, SCNA = somatic copy number alteration.  
*P*-values were determined by Pearson's chi-square test.

**Supplementary Table 5. Primer sequences for fusion validation**

| Primer               | Sequence                   |
|----------------------|----------------------------|
| <i>ZC3H4</i> exon 14 | 5'- CGGTGTCCCTGACTTCCTG-3' |
| <i>TFE3</i> exon 7   | 5'-GCCTTTGCCTCGGTCT-3'     |
| <i>FUBP1</i> exon 15 | 5'-ACCAGGCCCGGCTCCTCA-3'   |
| <i>TFE3</i> exon 3   | 5'-GCCTGTTCCCGACGCTC-3'    |
| <i>SETD1B</i> exon 4 | 5'- GCGTGGGGCGAGTCTCAT-3'  |
| <i>TFE3</i> exon 4   | 5'- GGACCCGATGGTGAGCAGC-3' |
