# Supplementary material for: Integrated exome and RNA sequencing of TFE3-translocation renal cell carcinoma
Source: PubMed Central journal article supplement (PMC8421377; doi:10.1038/s41467-021-25618-z), 2021-09-06
Supplement: 41467_2021_25618_MOESM3_ESM.pdf [file 41467_2021_25618_MOESM3_ESM.pdf]

### **Description of Additional Supplementary Files**

File Name: Supplementary Data 1

Description: Overview of patients and samples

File Name: Supplementary Data 2

Description: Exons and functional domains of the TFE3 and fusion partner genes

File Name: Supplementary Data 3

Description: Somatic mutations detected by WES

File Name: Supplementary Data 4

Description: Recurrent copy number alterations identified by FACETS and GISTIC analysis

File Name: Supplementary Data 5

Description: Differentially expressed genes by DESeq2 analysis

File Name: Supplementary Data 6

Description: Non-negative matrix factorization (NMF) clustering by QuSAGE analysis
